# Supplementary material
Source: PubMed Central journal article supplement (PMC283509)

A.

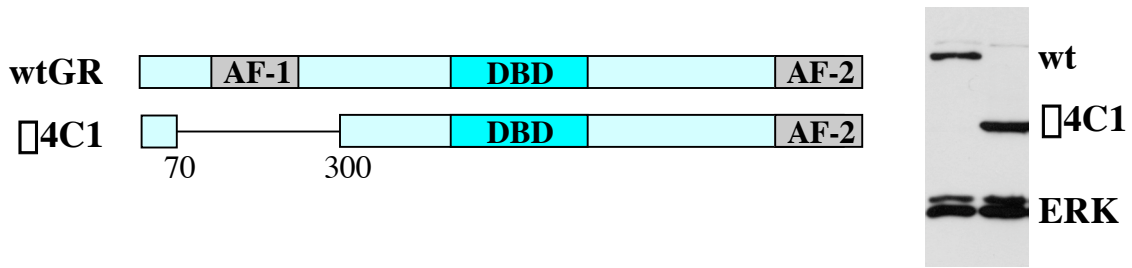

B.

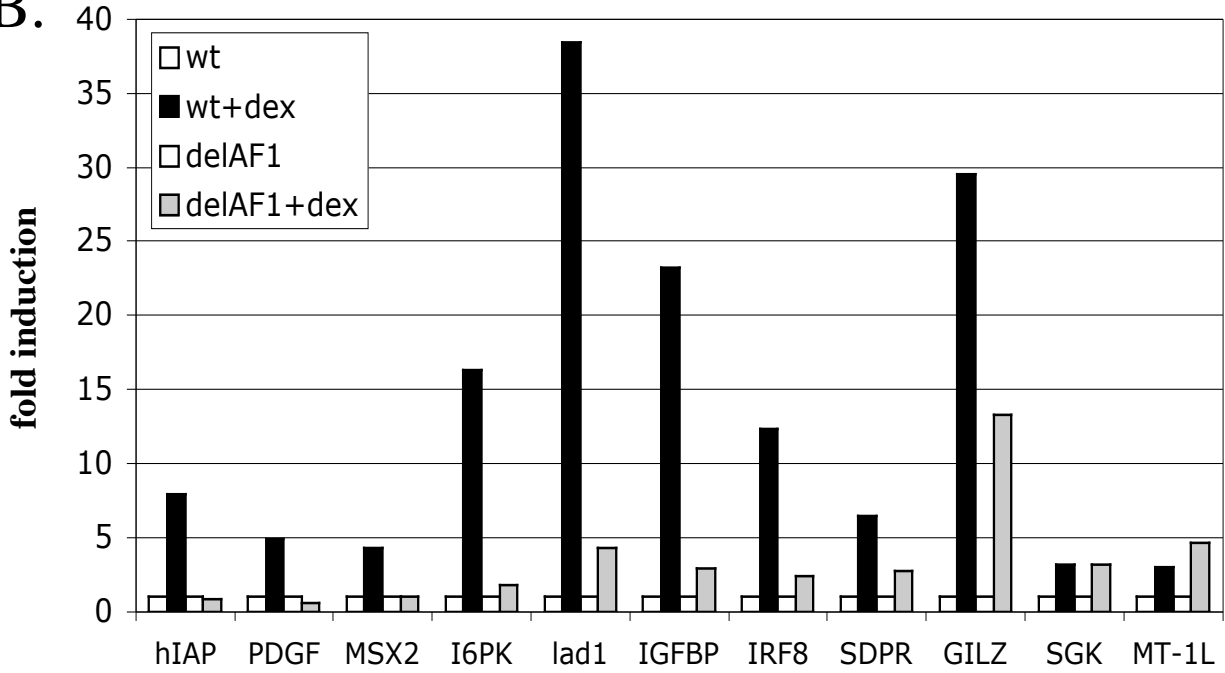

C.

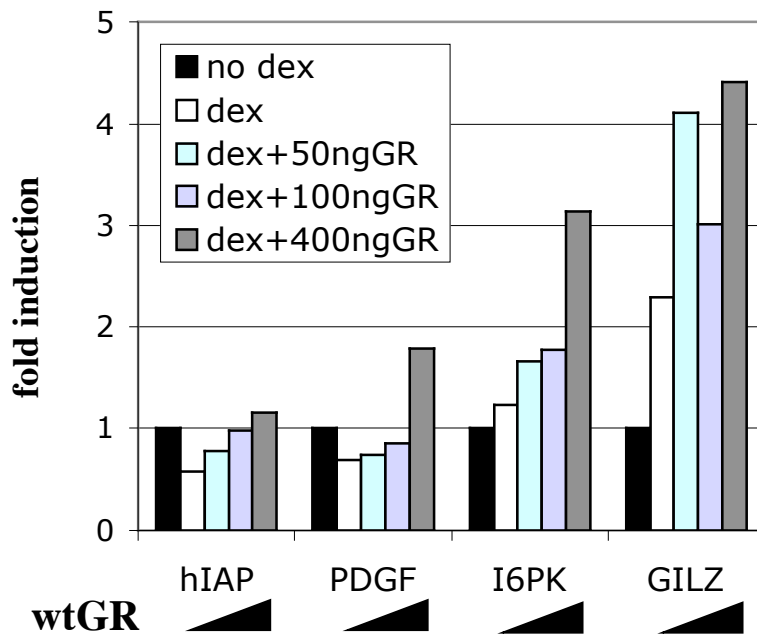

Supplement: pnas_100_24_13845__3.pdf [file pnas_100_24_13845__3.pdf]
